# Supplementary material for: Structural study of complexes formed by acidic and neutral organophosphorus reagents
Source: Royal Society of Chemistry journal article supplement (doi:10.1039/c6dt04305d), 2016-12-24
Supplement: c6dt04305d1.pdf [file c6dt04305d1.pdf]

Supporting Information for

**Structural Study of Complexes Formed by Acidic and Neutral Organophosphorus Reagents**

**Alexander D. Braatz<sup>1,2</sup>, Mark R. Antonio<sup>3</sup>, and Mikael Nilsson<sup>1,4</sup>**

<sup>1</sup> Department of Chemical Engineering and Materials Science, University of California Irvine, 916 Engineering Tower, Irvine, California 92697-2575 United States

<sup>2</sup> Nuclear Security and Isotope Technology Division, Oak Ridge National Laboratory, 1 Bethel Valley Road, Oak Ridge, TN 37831-6243 United States

<sup>3</sup> Chemical Sciences & Engineering Division, Argonne National Laboratory, 9700 South Cass Avenue, Lemont, Illinois 60439-4831 United States

<sup>4</sup> Department of Chemistry, University of California Irvine, 1102 Natural Sciences 2, Irvine, CA 92697-2025, United States.

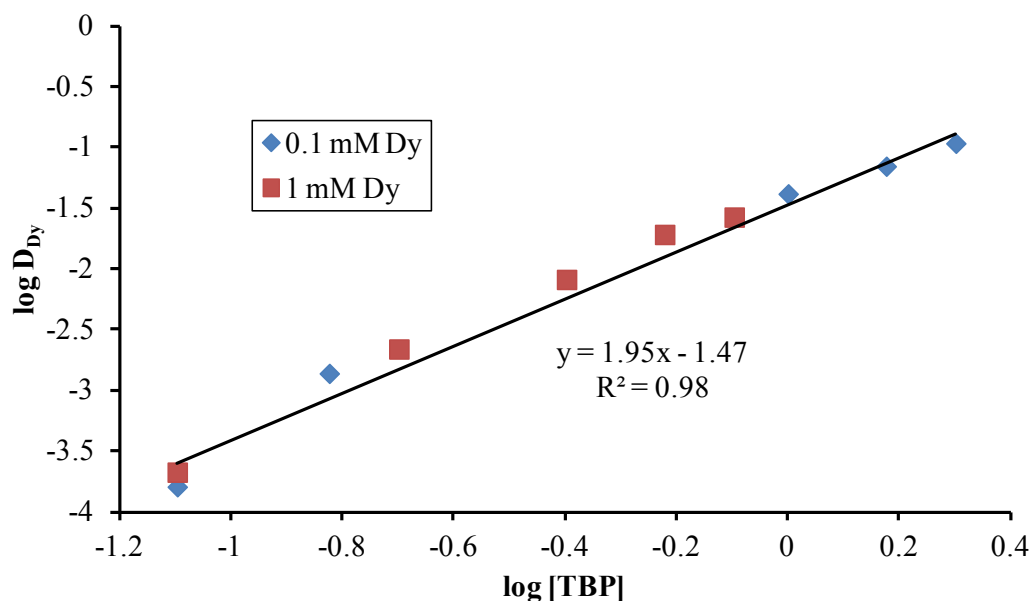

Figure S1. Slope analysis for dysprosium extraction by TBP from 2 M HNO<sub>3</sub>. Two separate experiments were carried out at different dates, one using 10<sup>-3</sup> M Dy<sup>3+</sup> and one with 10<sup>-4</sup> M Dy<sup>3+</sup>. The dysprosium concentration in each phase was determined by neutron activation analysis as outlined in the manuscript.

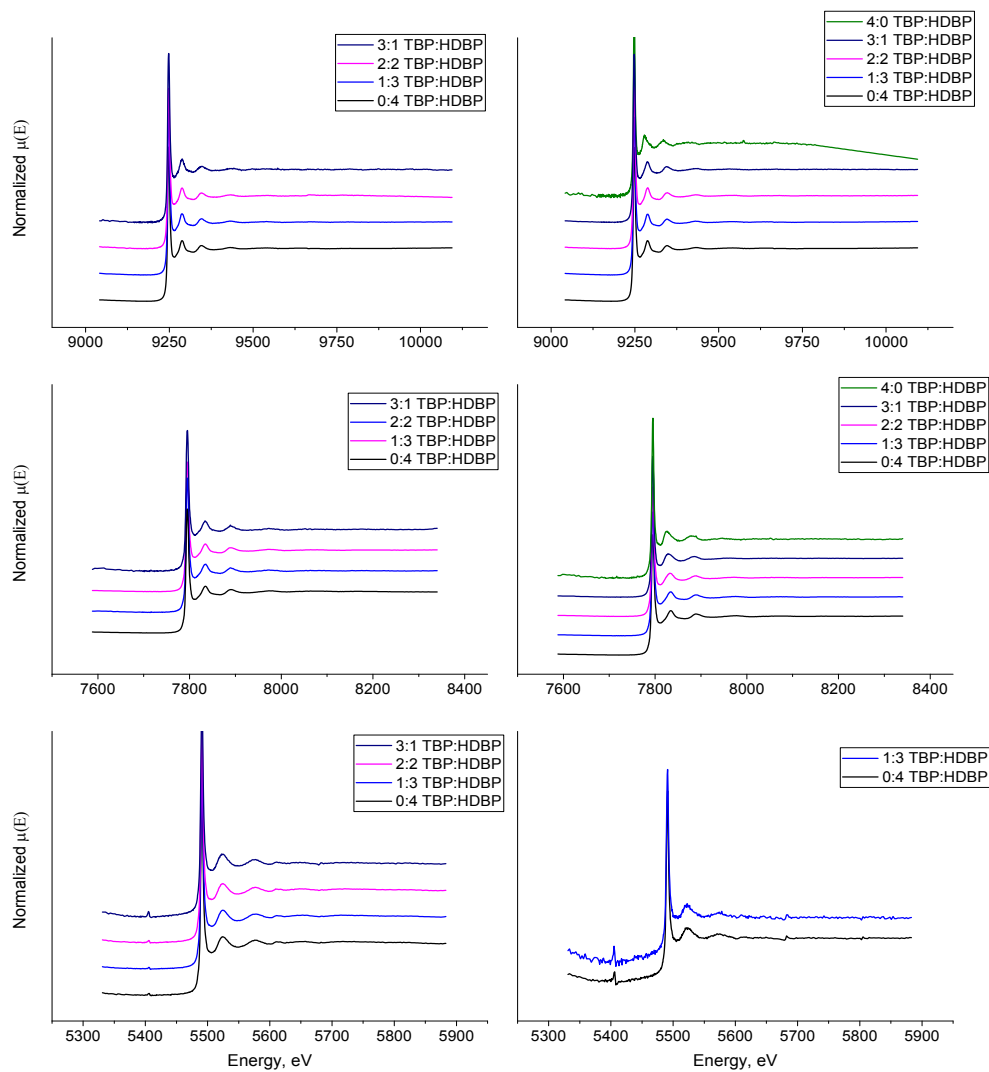

Figure S2. The normalized primary X-ray absorption spectra,  $I_f/I_0$  vs. energy for Lu in 0.2 M  $\text{HNO}_3$  (top left), Lu in 2 M  $\text{HNO}_3$  (top right), Dy in 0.2 M (middle left), Dy in 2 M  $\text{HNO}_3$  (middle right), La in 0.2 M  $\text{HNO}_3$  (bottom left), and La in 2 M  $\text{HNO}_3$  (bottom right).

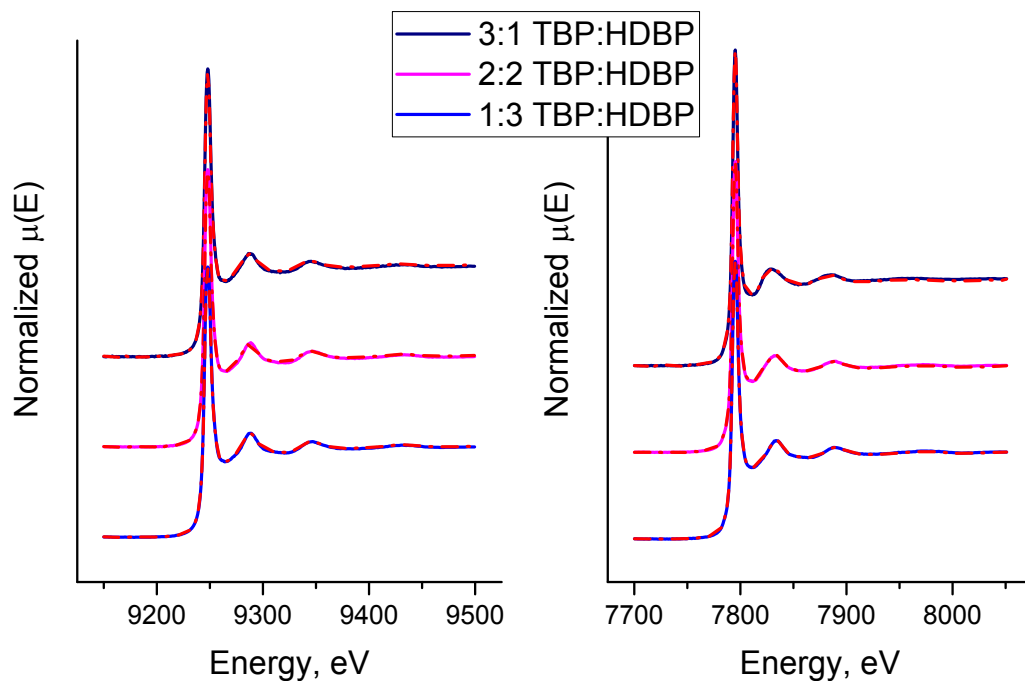

Figure S3: The normalized primary X-ray absorption spectra and linear combination fits (shown in red) for Lu in 2 M HNO<sub>3</sub> (left) and Dy in 2 M HNO<sub>3</sub> (right).

Table S1. Linear combination (LC) fitting results showing the percentage weight of each end member species giving rise to the final LC fits shown in Figure S2.

| <b>Organic Phase Composition</b> | <b>Dy-TBP %</b> | <b>Dy-HDBP %</b> | <b>Lu-TBP %</b> | <b>Lu-HDBP %</b> |
|----------------------------------|-----------------|------------------|-----------------|------------------|
| <b>0.75 M TBP/0.25 M HDBP</b>    | 56.9            | 43.1             | 23.4            | 76.6             |
| <b>0.5 M TBP/0.5 M HDBP</b>      | 26.7            | 73.3             | 11.9            | 88.1             |
| <b>0.25 M TBP/0.75 M HDBP</b>    | 9.5             | 90.5             | 5.5             | 94.5             |
